# Supplementary material for: Comparing cDNA and oligonucleotide array data: concordance of gene expression across platforms for the NCI-60 cancer cells
Source: Springer Nature journal article supplement (doi:10.1186/gb-2003-4-12-r82), 2003-11-25
Supplement: Additional file 1 [file gb-2003-4-12-r82-s1.doc]

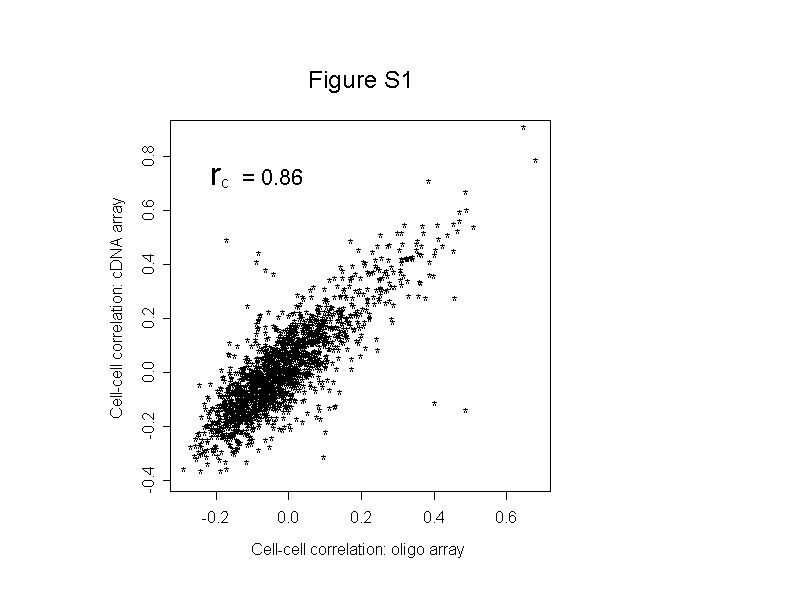


**Fig. S1.** Scatter plot of cell-cell Pearson correlation coefficients that relate the cDNA array and oligo array data sets. Each of the 1,770 points in the figure represents one of the 60*(60-1)/2 possible pairs of the 60 cell lines. The cell-cell “correlation of correlations” statistic, *rc,* reflects the dispersion of points around a linear fit in the figure.
