# Supplementary material for: Comparing cDNA and oligonucleotide array data: concordance of gene expression across platforms for the NCI-60 cancer cells
Source: Springer Nature journal article supplement (doi:10.1186/gb-2003-4-12-r82), 2003-11-25
Supplement: Additional file 11 [file gb-2003-4-12-r82-s11.doc]

Table 1. Correlation of real-time RT-PCR, cDNA-array, and oligo-array data for 5 genes (ABC transporters) in the 60 cell lines.

| Pearson Correlation | |  |  |  | 95% bootstrap confidence limits | | |  |
| --- | --- | --- | --- | --- | --- | --- | --- | --- |
|  | RT & cDNA | RT & Oligo | cDNA & Oligo | |  | RT & cDNA | RT & Oligo | cDNA & Oligo |
| ABCC1 | 0.44 | 0.16 | 0.13 |  | ABCC1 | (0.16 : 0.67) | (-0.01 : 0.29) | (-0.19 : 0.3) |
| ABCC2 | 0.78 | 0.67 | 0.88 |  | ABCC2 | (0.65 : 0.85) | (0.4 : 0.8) | (0.79 : 0.9) |
| ABCC6 | 0.32 | 0.20 | 0.48 |  | ABCC6 | Indeterminate |  |  |
| ABCE1 | -0.14 | 0.02 | 0.04 |  | ABCE1 | (-0.46 : 0.13) | (-0.25 : 0.24) | (-0.17 : 0.28) |
| ABCG1 | 0.69 | 0.46 | 0.57 |  | ABCG1 | (0.5 : 0.84) | (0.19 : 0.72) | (0.23 : 0.8) |

Portions of the RNA harvested for microarray studies were also used for the RT-PCR. Expression levels were measured using the LightCycler RNA Amplification SYBR Green kit (Roche Biochemicals, Indianapolis, IN) and the LightCylcer machine (manufacturer?). RT-PCR was carried out on 150 ng total RNA, in the presence of 250 nM specific primers. Following reverse transcription (20 min at 40 oC), the PCR reaction consisted of 45 cycles of denaturation (15 sec at 95 oC), annealing (30 sec at 58 oC), and elongation (30 sec at 72 oC). Primer sequences were as follows:

(ABCC1): 5’AGTGGAACCCCTCTCTGTTTAAG 5’CCTGATACGTCTTGGTCTTCATC

(ABCC2): 5’TCCTTGCGCAGCTGGATTACAT 5’TCGCTGAAGTGAGAGTAGATTG

(ABCC6): 5’GGCCCGGGCATCCAGGTT 5’TTTCATCTACGCGAGCATTGTTCT

(ABCE1): 5’GGTTGCCTATCCCTCGTCCAG 5’TGTCCCCTTTGCCAGCCTTAG

(ABCG1): 5’CAGGAAGATTAGACACTGTGG 5’GAAAGGGGAATGGAGAGAAGA

Since the expression of housekeeping genes (GAPDH, PBGD, YWHAZ) was found to be highly variable across the 60 cell lines (not shown), the data were normalized by the average expression of 48 ABC transporter genes.
